# Supplementary material for: Sex, race, and the role of relationships in diabetes health: intersectionality matters
Source: Springer Nature journal article supplement (doi:10.1007/s10865-019-00057-w), 2019-05-17
Supplement: MOESM1 [file 16731648]

Supplemental Materials

Sex, Race, and the Role of Relationships in Diabetes Health: Intersectionality Matters

*Supplemental Figure 1a.* Interaction between Sex and Race on Diabetes Self-Care.

Race:

*Supplemental Figure 1b.* Interaction between Sex and Race on Diabetes Self-Efficacy.

Race:

*Supplemental Figure 2.* Three-Way Interaction in the Association between Relationship Quality and Medication Adherence


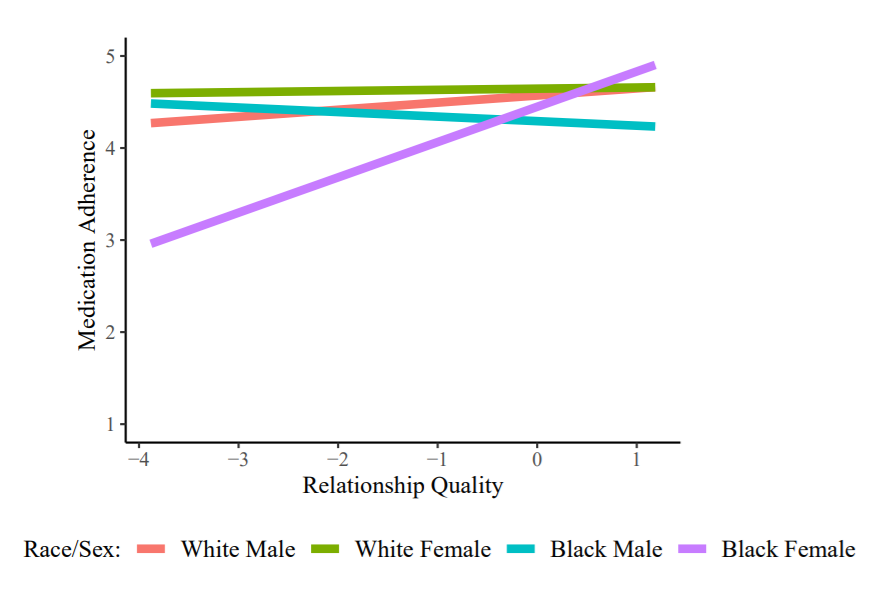


*B* = .37***

*B* = .06

*B* = .03

*B* = -.07

*Supplemental Figure 3.* Three-Way Interaction in the Association between Relationship Quality and Diabetes Self-Efficacy


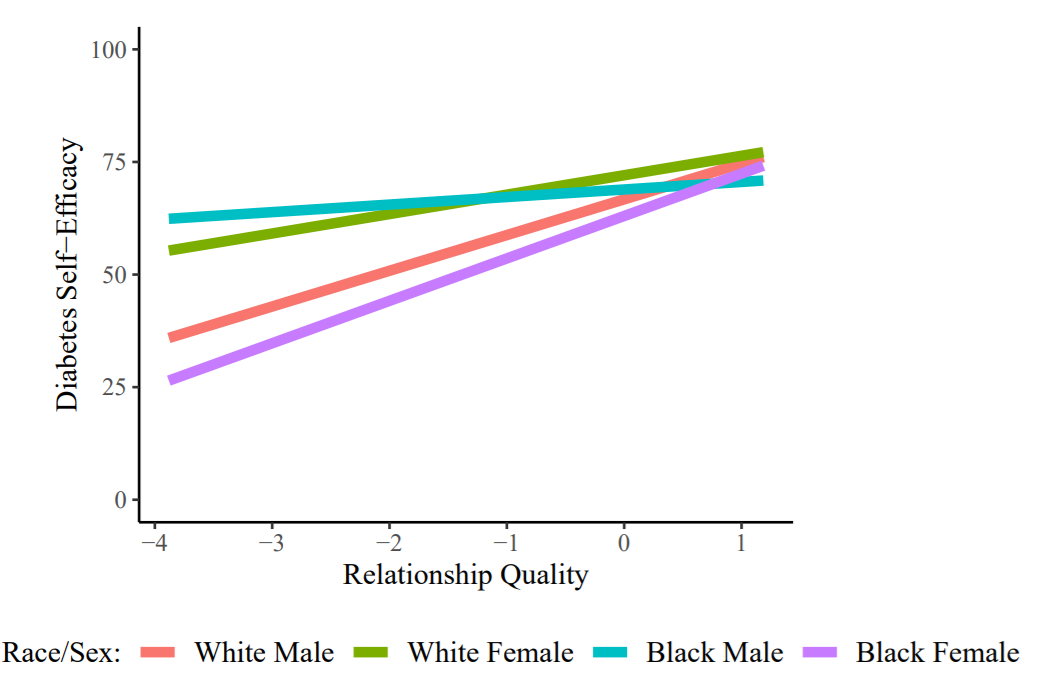


*B* = 1.63

*B* = 8.13***

*B* = 4.57*

*B* = 9.11***

*Supplemental Figure 4.* Two-Way Interaction in the Association between Relationship Quality and Depressive Symptoms


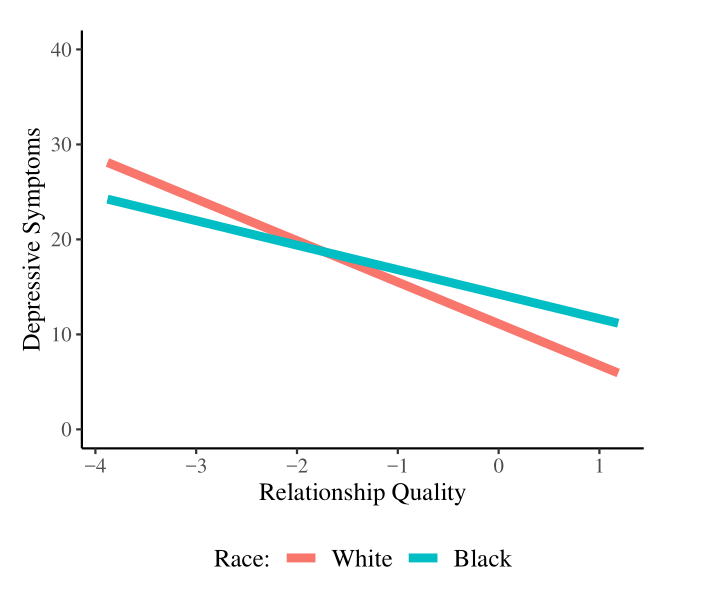


*B* = -1.69*

*B* = -4.15***
